# Supplementary material for: Identification of a glutamine metabolism reprogramming signature for predicting prognosis, immunotherapy efficacy, and drug candidates in bladder cancer
Source: Front Immunol. 2023 Feb 23;14:1111319. doi: 10.3389/fimmu.2023.1111319 (PMC9995899; doi:10.3389/fimmu.2023.1111319)
Supplement: Supplementary Table 1 — Clinical statistical analysis of Cluster 1 and Cluster 2. [file Table_1.xls]

Covariates	Cluster	Total	C1	C2
Age	<=60	107	75	32
Age	>60	296	169	127
Gender	FEMALE	105	74	31
Gender	MALE	298	170	128
Grade	High Grade	380	222	158
Grade	Low Grade	20	20	0
Stage	Stage I	2	2	0
Stage	Stage II	128	93	35
Stage	Stage III	140	74	66
Stage	Stage IV	131	73	58
M	M0	195	141	54
M	M1	11	3	8
Race	asian	42	22	20
Race	black or african american	22	20	2
Race	white	323	191	132
