# Supplementary material for: Identification of a glutamine metabolism reprogramming signature for predicting prognosis, immunotherapy efficacy, and drug candidates in bladder cancer
Source: Front Immunol. 2023 Feb 23;14:1111319. doi: 10.3389/fimmu.2023.1111319 (PMC9995899; doi:10.3389/fimmu.2023.1111319)
Supplement: Supplementary Table 2 — General characteristics of patients with TCGA, GSE13507 and GSE32894. [file Table_2.xls]

TCGA								GSE13507				GSE32894
Covariates	Risk	Total	high	low	chi	Pvalue		Covariates	Risk	Total		Covariates	Type	Total
Age	<=60	107(26.55%)	40(19.9%)	67(33.17%)	8.4268	0.0037		Gender	Female	30(18.18%)		Gender	Female	61(27.23%)
Age	>60	296(73.45%)	161(80.1%)	135(66.83%)				Gender	Male	135(81.82%)		Gender	Male	163(72.77%)
Gender	FEMALE	105(26.05%)	40(19.9%)	65(32.18%)	7.2584	0.0071		Age	<=60	46(27.88%)		Age	<=65	224(100%)
Gender	MALE	298(73.95%)	161(80.1%)	137(67.82%)				Age	>60	119(72.12%)		T	T1	63(28.12%)
Grade	High Grade	380(94.29%)	198(98.51%)	182(90.1%)	18.604	0		Invasiveness	muscle invasive	62(37.58%)		T	T2	43(19.2%)
Grade	Low Grade	20(4.96%)	0(0%)	20(9.9%)				Invasiveness	non-muscle invasive	103(62.42%)		T	T3	8(3.57%)
Grade	unknow	3(0.74%)	3(1.49%)	0(0%)				Grade	grade: high	61(36.97%)		T	unknown	110(49.11%)
Stage	Stage I	2(0.5%)	1(0.5%)	1(0.5%)	18.1559	4.00E-04		Grade	grade: low	104(63.03%)		G	G1	45(20.09%)
Stage	Stage II	128(31.76%)	45(22.39%)	83(41.09%)				recurrence	recurrence: No	67(40.61%)		G	G2	84(37.5%)
Stage	Stage III	140(34.74%)	74(36.82%)	66(32.67%)				recurrence	recurrence: Yes	36(21.82%)		G	G3	93(41.52%)
Stage	Stage IV	131(32.51%)	80(39.8%)	51(25.25%)				recurrence	unknown	62(37.58%)		G	unknown	2(0.89%)
Stage	unknow	2(0.5%)	1(0.5%)	1(0.5%)
T	T0	1(0.25%)	0(0%)	1(0.5%)	11.7635	0.0192
T	T1	3(0.74%)	2(1%)	1(0.5%)
T	T2	117(29.03%)	45(22.39%)	72(35.64%)
T	T3	192(47.64%)	110(54.73%)	82(40.59%)
T	T4	57(14.14%)	30(14.93%)	27(13.37%)
T	unknow	33(8.19%)	14(6.97%)	19(9.41%)
M	M0	195(48.39%)	80(39.8%)	115(56.93%)	1.3536	0.2446
M	M1	11(2.73%)	7(3.48%)	4(1.98%)
M	unknow	197(48.88%)	114(56.72%)	83(41.09%)
N	N0	235(58.31%)	100(49.75%)	135(66.83%)	11.8465	0.0079
N	N1	44(10.92%)	29(14.43%)	15(7.43%)
N	N2	75(18.61%)	44(21.89%)	31(15.35%)
N	N3	7(1.74%)	3(1.49%)	4(1.98%)
N	unknow	42(10.42%)	25(12.44%)	17(8.42%)
Cluster	C1	244(60.55%)	103(51.24%)	141(69.8%)	13.7592	2.00E-04
Cluster	C2	159(39.45%)	98(48.76%)	61(30.2%)
diagnosis_subtype		5(1.24%)	4(1.99%)	1(0.5%)	16.3267	3.00E-04
diagnosis_subtype	Non-Papillary	267(66.25%)	150(74.63%)	117(57.92%)
diagnosis_subtype	Papillary	131(32.51%)	47(23.38%)	84(41.58%)
lymphovascular_invasion_present		127(31.51%)	64(31.84%)	63(31.19%)	14.0866	9.00E-04
lymphovascular_invasion_present	NO	128(31.76%)	48(23.88%)	80(39.6%)
lymphovascular_invasion_present	YES	148(36.72%)	89(44.28%)	59(29.21%)
